# Supplementary material for: Hydrothermal synthesis of Fe3O4/RGO composites and investigation of electrochemical performances for energy storage applications
Source: Royal Society of Chemistry journal article supplement (doi:10.1039/c4ra07388f), 2014-01-01
Supplement: c4ra07388f1.pdf [file c4ra07388f1.pdf]

## Supporting information

### **Hydrothermal synthesis of Fe<sub>3</sub>O<sub>4</sub>/RGO composites and investigation of electrochemical performances for energy storage application**

Sanjit Saha, Milan Jana, Pranab Samanta, Naresh Chandra Murmu, Nam Hoon Kim,

Tapas Kuila,\* and Joong Hee Lee\*

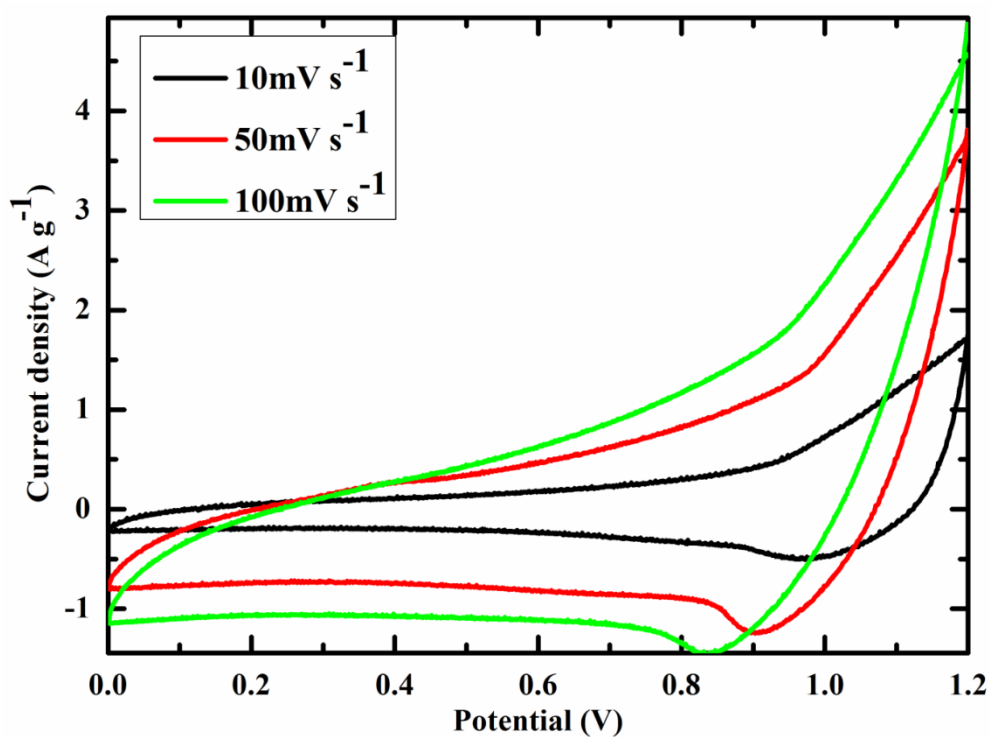

**Fig. S1** CV of RGO at different scan rate

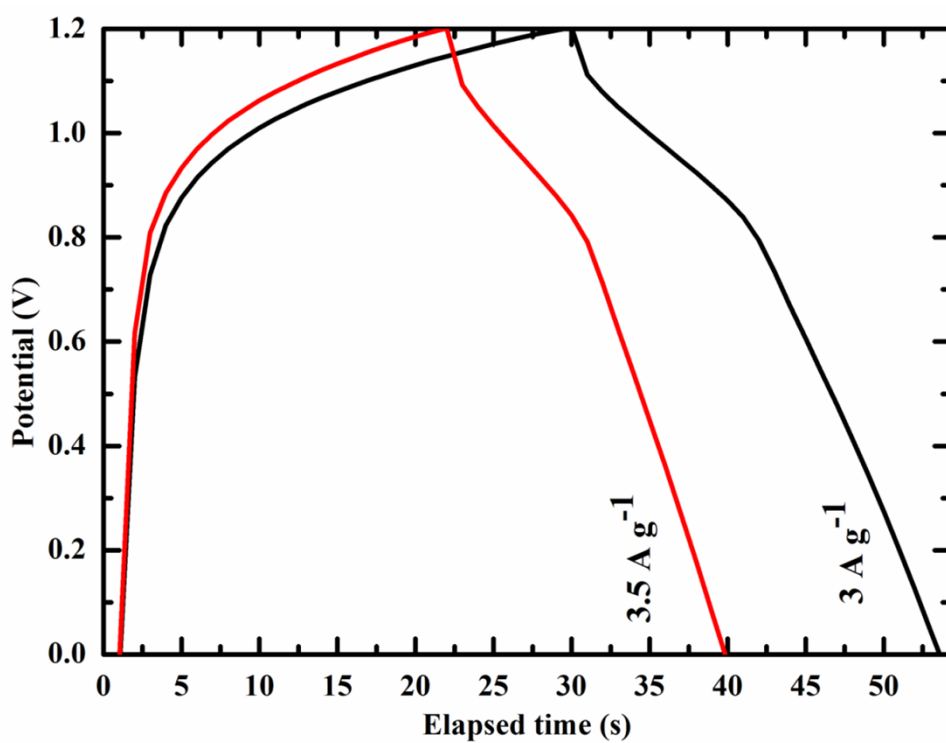

Fig. S2 CD of RGO at different current density

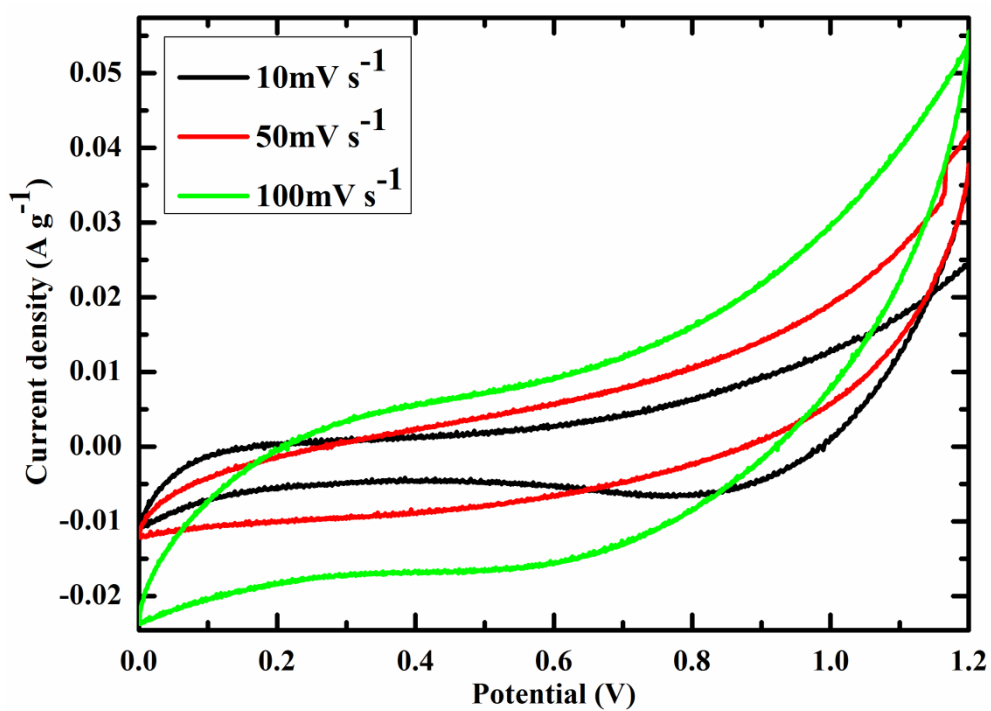

Fig. S3 CV of bare nickel foam at different scan rate

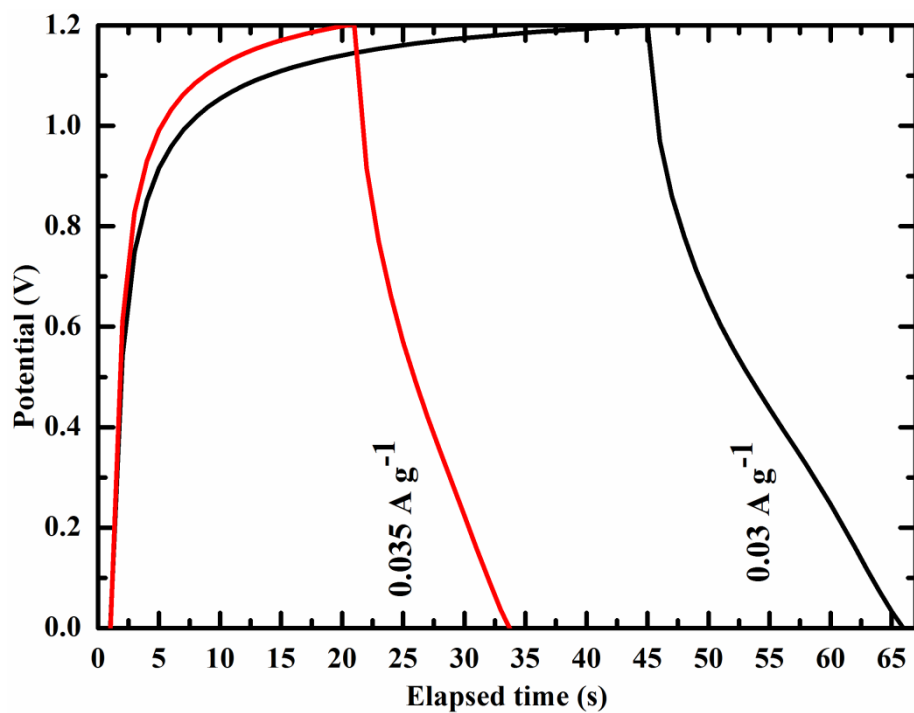

Fig. S4 CD of bare nickel foam at different current density

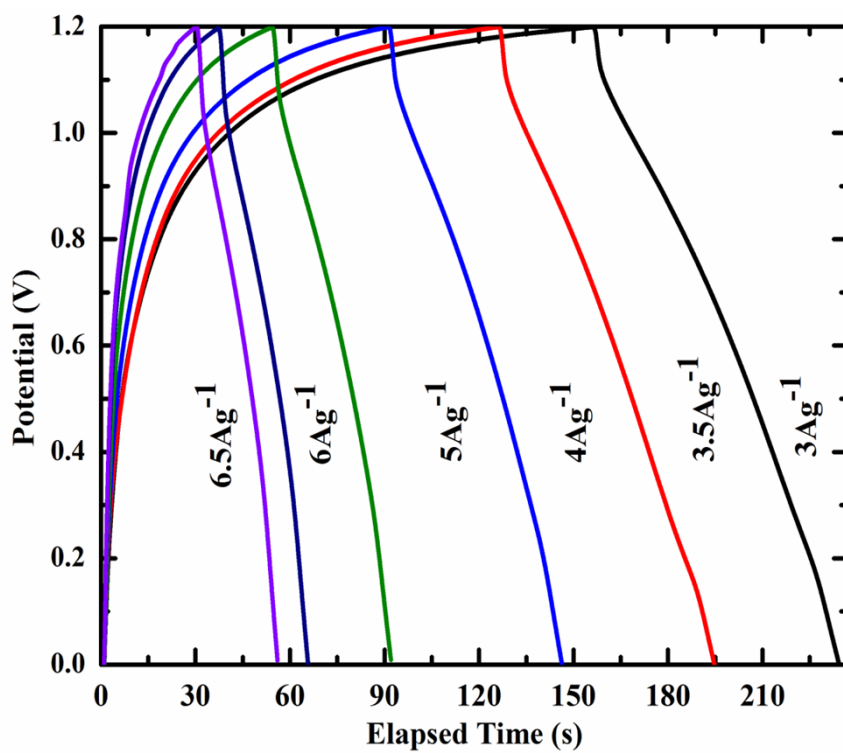

Fig. S5 CD of FRGO2 with higher current density

**Table S1** Comparison of the coulombic efficiency of different reported supercapacitor

| <b>Materials</b>                                   | <b>Working System</b> | <b>Coulombic efficiency (%)</b> | <b>Current density (A g<sup>-1</sup>)</b> | <b>Reference</b> |
|----------------------------------------------------|-----------------------|---------------------------------|-------------------------------------------|------------------|
| Co <sub>9</sub> S <sub>8</sub> nano tube           | Two electrode         | ~61                             | 4                                         | 1                |
| graphene/Co <sub>3</sub> O <sub>4</sub> composites | Three electrode       | ~69                             | 5                                         | 2                |
| 3D graphene oxide hydrogel                         | Two electrode         | ~69                             | 1                                         | 3                |
| Reduced Graphene Oxide/Manganese Dioxide Paper     | Two electrode         | ~62                             | 0.1                                       | 4                |
| Functionalized Exfoliated Graphene Oxide           | Two electrode         | ~73                             | 20 mA cm <sup>-2</sup>                    | 5                |
| Fe <sub>3</sub> O <sub>4</sub> /rGO composite      | Three electrode       | ~62                             | 0.5                                       | 6                |
| Graphene nanoplatelets supported MnO <sub>2</sub>  | Two electrode         | ~51                             | 1.1                                       | 7                |
| Co <sub>3</sub> O <sub>4</sub> /graphene           | Three electrode       | ~73                             | 1                                         | 8                |
| Graphene Oxide/MnO <sub>2</sub>                    | Three electrode       | ~54                             | 0.15                                      | 9                |
| FRGO2                                              | Two electrode         | ~50                             | 3                                         | Present work     |
| FRGO2                                              | Two electrode         | ~68                             | 5                                         | Present work     |
| FRGO2                                              | Two electrode         | ~80                             | 6.5                                       | Present work     |

**Table S2** Comparison of the performances of different reported metal oxide supercapacitor

| Sample                                                                | Specific capacitance                                            | Energy density (W h kg <sup>-1</sup> ) | Power density (W kg <sup>-1</sup> ) | References   |
|-----------------------------------------------------------------------|-----------------------------------------------------------------|----------------------------------------|-------------------------------------|--------------|
| Fe <sub>3</sub> O <sub>4</sub> /graphene                              | 220.1 F g <sup>-1</sup> at 0.5 A g <sup>-1</sup>                | -----                                  |                                     | 6            |
| α-Fe <sub>2</sub> O <sub>3</sub>                                      | 256 F g <sup>-1</sup> a scan rate of 1 mV s <sup>-1</sup>       | 13                                     | 1149                                | 10           |
| Graphene/Co <sub>3</sub> O <sub>4</sub> composite                     | 443 F g <sup>-1</sup> at of 5 A g <sup>-1</sup>                 | -----                                  |                                     | 2            |
| Graphene/MnO <sub>2</sub>                                             | 315 Fg <sup>-1</sup> at scan rate 2 mV s <sup>-1</sup>          | 12.5                                   | 110                                 | 11           |
| Graphene/NiO composites                                               | 525 F g <sup>-1</sup> at 200 mA g <sup>-1</sup>                 | -----                                  |                                     | 12           |
| MnO <sub>2</sub> Decorated Graphene                                   | 124 F g <sup>-1</sup> at 200 mA g <sup>-1</sup>                 | 16.5                                   | 200                                 | 13           |
| Graphene/SnO <sub>2</sub> /poly pyrrole                               | 616 F g <sup>-1</sup> at 1 mV s <sup>-1</sup>                   | 19.4                                   | 9973                                | 14           |
| Fe <sub>3</sub> O <sub>4</sub> functionalised graphene                | 180 F g <sup>-1</sup> at 10 mV s <sup>-1</sup>                  | -----                                  |                                     | 15           |
| RuO <sub>2</sub> -functionalized graphene (25 wt % RuO <sub>2</sub> ) | 265 F g <sup>-1</sup> at 10 mV s <sup>-1</sup>                  | -----                                  |                                     | 15           |
| Fe <sub>3</sub> O <sub>4</sub> with 10 wt % carbon black              | 5.3 F g <sup>-1</sup> at constant current 15 mA g <sup>-1</sup> | -----                                  |                                     | 16           |
| MnO <sub>2</sub> /graphitic petal/carbon nanotube                     | 580 F g <sup>-1</sup> at 2 mV s <sup>-1</sup>                   | 28                                     | 2500                                | 17           |
| NiCo <sub>2</sub> O <sub>4</sub> nanowires-graphene                   | 737 F g <sup>-1</sup> at 1 A g <sup>-1</sup>                    | -----                                  |                                     | 18           |
| FRGO1                                                                 | 519 F g <sup>-1</sup> at 3 A g <sup>-1</sup>                    | 25.95                                  | 1800                                | Present work |
| FRGO2                                                                 | 782 F g <sup>-1</sup> at 3 A g <sup>-1</sup>                    | 39.1                                   | 1800                                | Present work |
| FRGO3                                                                 | 553.8 F g <sup>-1</sup> at 3 A g <sup>-1</sup>                  | 27.15                                  | 1800                                | Present work |

## References

1. J. Pu, Z. Wang, K. Wu, N. Yu and E. Sheng, *Phys.Chem.Chem.Phys.*, 2014, **16**, 785.
2. S. Huang, Y. Jin and M. Jia, *Electrochimica Acta*, 2013, **95**, 139-145.
3. V. H. Luan, H. N. Tien, L. T. Hoa, N. T. M. Hien, E. S. Oh, J. S. Chung, E. J. Kim, W. M. Choi, B. S. Kongb and S. H. Hur, *J. Mater. Chem. A*, 2013, **1**, 208.

4. A. Sumboja, C. Y. Foo, X. Wang and P. S. Lee, *Adv. Mater.* 2013, **25**, 2809-2815.
5. P. Karthika, N. Rajalakshmi and K. S. Dhathathreyan, *Soft Nanoscience Letters*, 2012, **2**, 59-66.
6. Q. Wang, L. Jiao, H. Du, Y. Wang and H. Yuan, *J. Power Sources*, 2014, **245**, 101-106.
7. A. Yu, A. Sy and A. Davies, *Synthetic Metals*, 2011, **161**, 2049-2054.
8. S. Park and S. Kim, *Electrochim. Acta*, 2013, **89**, 516-522.
9. S. Chen, J. Zhu, X. Wu, Q. Han and X. Wang, *Acs Nano*, 2010, **4**, 5.
10. G. Binitha, M. S. Soumya, A. A. Madhavan, P. Praveen, A. Balakrishnan, K. R. V. Subramanian, M. V. Reddy, S. V. Nair, A. Sreekumaran Nair and N. Sivakumar, *J. Mater. Chem. A*, 2013, **1**, 11698-11704.
11. G. Yu, L. Hu, M. Vosgueritchian, H. Wang, X. Xie, J. R. McDonough, X. Cui, Yi Cui and Zhenan Bao, *Nano Lett.*, 2011, **11**, 2905-2911.
12. B. Zhao, J. Song, P. Liu, W. Xu, T. Fang, Z. Jiao, H. Zhang and Y. Jiang, *J. Mater. Chem.*, 2011, **21**, 18792-18798.
13. Y. Li, N. Zhao, C. Shi, E. Liu and C. He, *J. Phys. Chem. C*, 2012, **116**, 25226-25232.
14. W. Wang, Q. Hao, W. Lei, X. Xia and X. Wang, *RSC Adv.*, 2012, **2**, 10268-10274.
15. A. K. Mishra and S. Ramaprabhu, *J. Phys. Chem. C*, 2011, **115**, 14006-14013.
16. Y. S. Wang, L. N. Wu, *J. Appl. Electrochem.*, 2003, **33**, 345.
17. G. Xiong, K.P.S.S. Hembra, R.G. Reifenberger and T. S. Fisher, *J Power Sources*, 2013, **227**, 254-259.
18. G. He, L. Wanga, H. Chen, X. Sun and X. Wang, *Materials Letters*, 2013, **98**, 164-167.
